# Supplementary material for: Synergetic effect over flame-made manganese doped CuO–CeO2 nanocatalyst for enhanced CO oxidation performance
Source: Royal Society of Chemistry journal article supplement (doi:10.1039/c8ra09626k), 2019-01-01
Supplement: c8ra09626k1.pdf [file c8ra09626k1.pdf]

## Synergetic Effect over Flame-made Manganese Doped CuO-CeO<sub>2</sub> Nanocatalyst for Enhanced CO Oxidation Performance

Feng Zhao,<sup>ab</sup> Shuangde Li,<sup>a</sup> Xiaofeng Wu,<sup>a</sup> Renliang Yue,<sup>a</sup> Weiman Li<sup>ab</sup> and Yunfa  
Chen <sup>\*ac</sup>

<sup>a</sup> State Key Laboratory of Multi-phase Complex Systems, Institute of Process Engineering,

Chinese Academy of Sciences, Beijing 100190, PR China

<sup>b</sup> University of Chinese Academy of Sciences, Beijing 100049, PR China

<sup>c</sup> Center for Excellence in Regional Atmospheric Environment, Institute of Urban Environment,

Chinese Academy of Sciences, Xiamen 361021, PR China

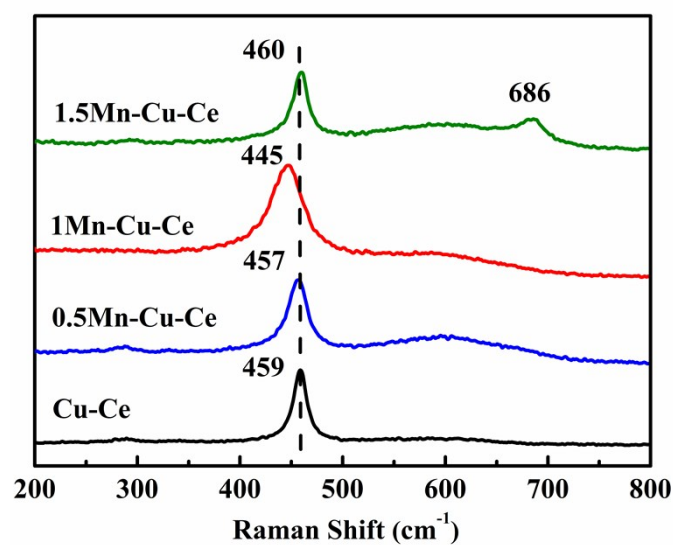

Fig. S1 Raman spectra of the as-synthesized catalysts.

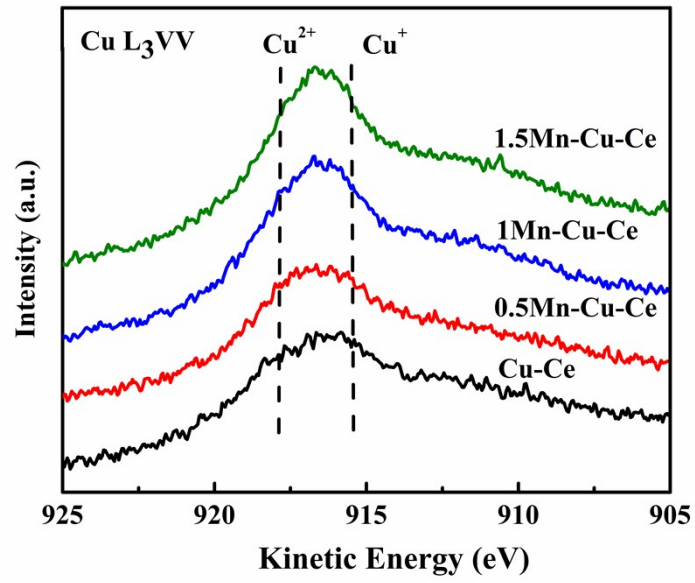

**Fig. S2** Kinetic energy spectra of Cu L<sub>3</sub>VV Auger of the as-synthesized samples
